# Supplementary material
Source: publisher figshare collection journal article supplement (https://tandf.figshare.com/articles/dataset/_/6276212)
Supplement: Supplementary file 1 [file 1]

## Detrital zircon U–Pb geochronology of Permian strata in the Galilee Basin, Queensland, Australia

L. J. Phillips<sup>a\*</sup>, C. Verdel<sup>a</sup>, C. M. Allen<sup>b</sup> and J. S. Esterle<sup>a</sup>

<sup>a</sup> School of Earth and Environmental Sciences, University of Queensland, Brisbane, Qld 4072, Australia

<sup>b</sup> School of Earth, Environmental and Biological Sciences, Queensland University of Technology, Brisbane, Qld 4001, Australia

Received 18 June 2017; accepted 3 February 2018

\* [l.phillips3@uq.edu.au](mailto:l.phillips3@uq.edu.au)

### SUPPLEMENTARY PAPERS

*Australian Journal of Earth Sciences* (2018) 65 (4), 465–481.

<http://dx.doi.org/10.1080/08120099.2018.1467261>

---

Copies of Supplementary Papers may be obtained from the Geological Society of Australia's website ([www.gsa.org.au](http://www.gsa.org.au)), the Australian Journal of Earth Sciences website ([www.ajes.com.au](http://www.ajes.com.au)) or from the National Library of Australia's Pandora archive (<http://nla.gov.au/nla.arc-25194>).

---

### Supplementary papers

Appendix 1. LA-ICPMS data for samples GPC\_A, GPC\_B and GPC\_C (Excel file)
